# Supplementary material for: Isolation, Identification, and Characterization of an Acid-Tolerant Pichia kudriavzevii and Exploration of Its Acetic Acid Tolerance Mechanism
Source: MDPI journal article supplement (doi:10.3390/fermentation9060540), 2023-06-02
Supplement: s1 [file s1]

**Supplementary Table S1 Sample sequencing data quality summary**

| <b>sample</b> | <b>library</b>   | <b>raw_reads</b> | <b>raw_bases</b> | <b>clean_reads</b> | <b>clean_bases</b> | <b>error_rate</b> | <b>Q20</b> | <b>Q30</b> | <b>GC_pct</b> |
|---------------|------------------|------------------|------------------|--------------------|--------------------|-------------------|------------|------------|---------------|
| C_1           | FRAS210258659-1r | 49097042         | 7.36G            | 47650494           | 7.15G              | 0.03              | 97.88      | 93.88      | 41.05         |
| C_2           | FRAS210258660-1r | 42127470         | 6.32G            | 40544014           | 6.08G              | 0.03              | 97.7       | 93.57      | 41.01         |
| C_3           | FRAS210258661-1r | 46371834         | 6.96G            | 44471790           | 6.67G              | 0.03              | 97.97      | 94.13      | 41.18         |
| AL_1          | FRAS210258662-1r | 41323968         | 6.2G             | 39800440           | 5.97G              | 0.03              | 97.87      | 93.9       | 42.58         |
| AL_2          | FRAS210258663-1r | 40454688         | 6.07G            | 38052958           | 5.71G              | 0.03              | 97.84      | 93.88      | 41.02         |
| AL_3          | FRAS210258664-1r | 46349704         | 6.95G            | 44197066           | 6.63G              | 0.03              | 97.77      | 93.66      | 40.97         |
| AH_1          | FRAS210258665-1r | 45810688         | 6.87G            | 44109468           | 6.62G              | 0.03              | 97.87      | 93.92      | 41.35         |
| AH_2          | FRAS210258666-1r | 45386156         | 6.81G            | 43704576           | 6.56G              | 0.03              | 97.84      | 93.84      | 41.31         |
| AH_3          | FRAS210258667-1r | 46681954         | 7G               | 44892200           | 6.73G              | 0.03              | 97.81      | 93.75      | 41.27         |
| LL_1          | FRAS210258668-1r | 43477412         | 6.52G            | 41949060           | 6.29G              | 0.03              | 97.82      | 93.78      | 41.36         |
| LL_2          | FRAS210258669-1r | 47259564         | 7.09G            | 45180382           | 6.78G              | 0.03              | 97.85      | 93.89      | 41.33         |
| LL_3          | FRAS210258670-1r | 42716292         | 6.41G            | 41326010           | 6.2G               | 0.03              | 97.82      | 93.78      | 41.29         |
| LH_1          | FRAS210258671-1r | 44999236         | 6.75G            | 43251306           | 6.49G              | 0.03              | 97.76      | 93.69      | 41            |
| LH_2          | FRAS210258672-1r | 46979878         | 7.05G            | 45059198           | 6.76G              | 0.03              | 97.82      | 93.81      | 40.95         |
| LH_3          | FRAS210258673-1r | 45758748         | 6.86G            | 43979916           | 6.6G               | 0.03              | 97.77      | 93.69      | 40.93         |

Note: raw\_Reads: the number of reads in the raw data, clean\_Reads: the number of filtered reads of the raw data, clean\_Bases: base number of filtered raw data

(clean base = clean reads \* 150bp), error\_Rate: overall sequencing error rate of data, Q20: percentage of bases with phred value greater than 20 in total bases,

Q30: percentage of bases with phred value greater than 30 in total bases, GC\_PCT: percentage of G and C in four bases of clean reads.
